# Supplementary material for: Engineering the Metabolic Profile of Clostridium cellulolyticum with Genomic DNA Libraries
Source: MDPI journal article supplement (doi:10.3390/fermentation9070605), 2023-06-27
Supplement: s1 [file s1]

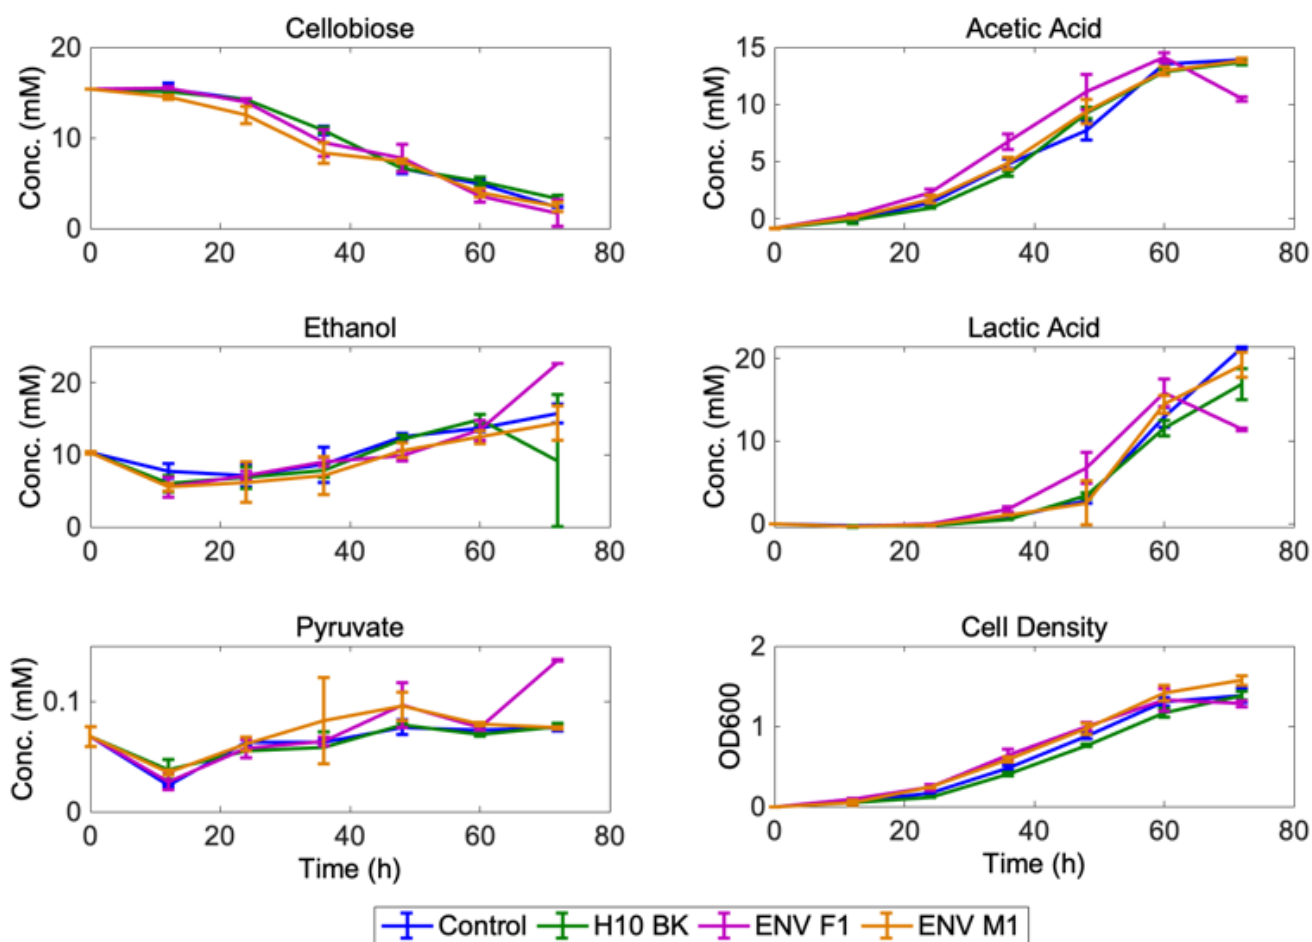

**Figure S3.** Metabolic profile and OD600 data for serially cultured strains containing the enriched DNA fragments specified in Table 3. Data for the strain containing the H10\_Phage fragment is shown in Figure 2 in the manuscript.
